# Supplementary material for: Corosolic acid sensitizes ferroptosis by upregulating HERPUD1 in liver cancer cells
Source: PubMed Central journal article supplement (PMC9424261; doi:10.1038/s41420-022-01169-0), 2022-08-29

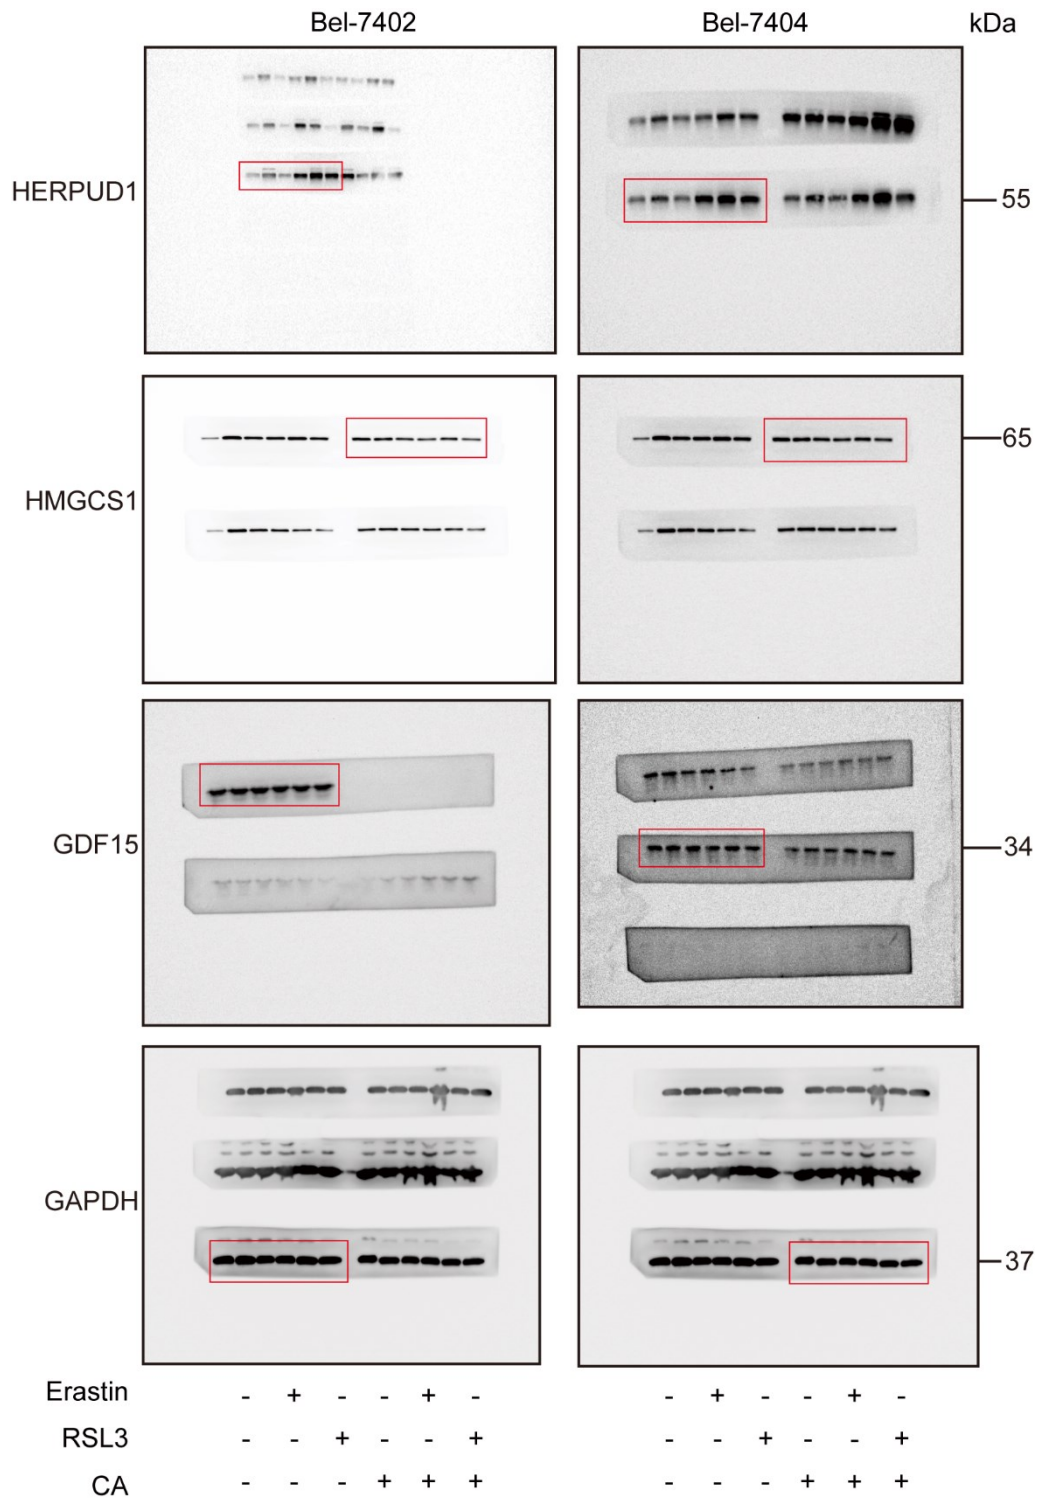

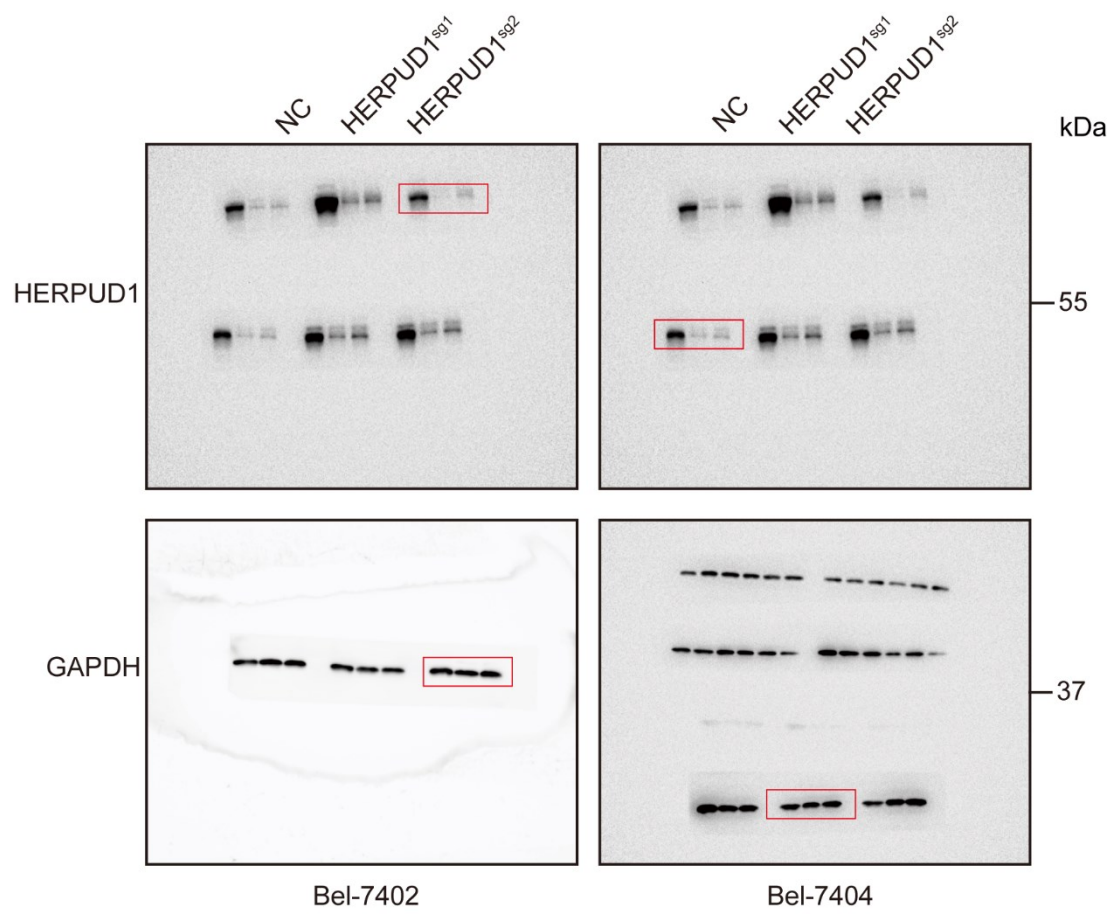

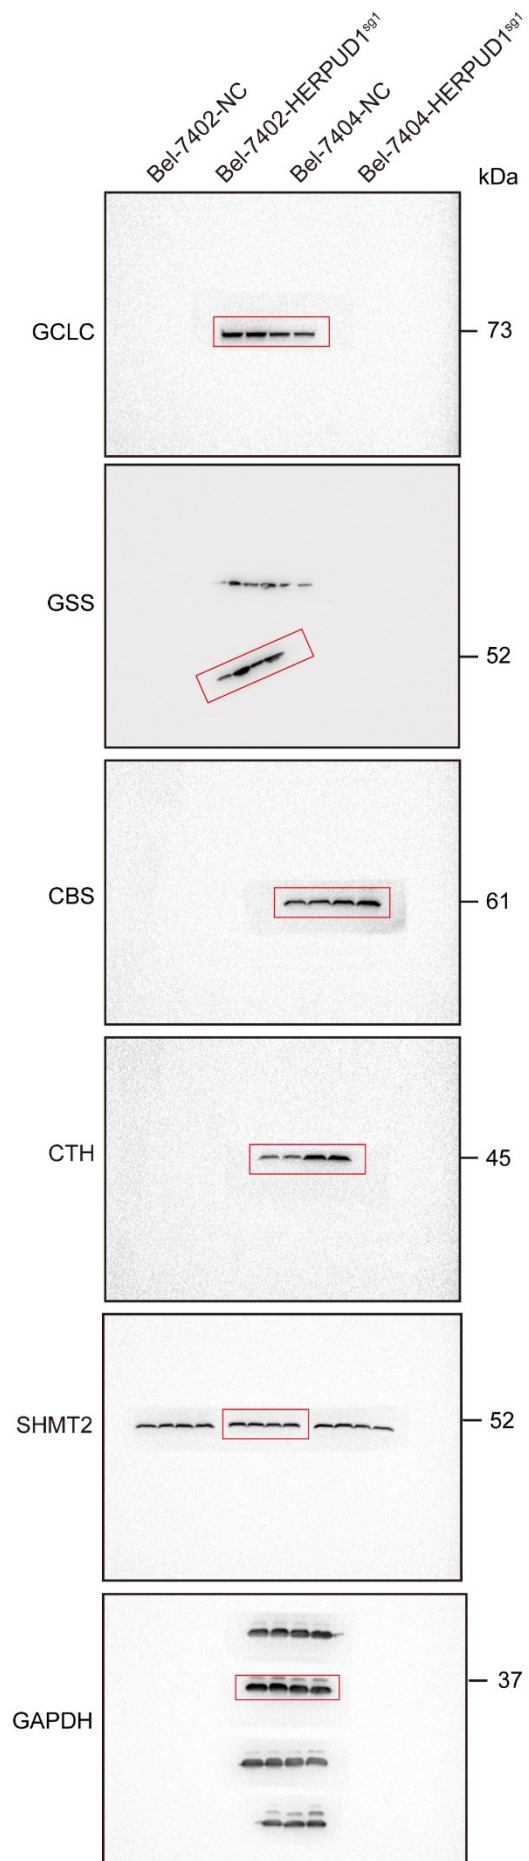

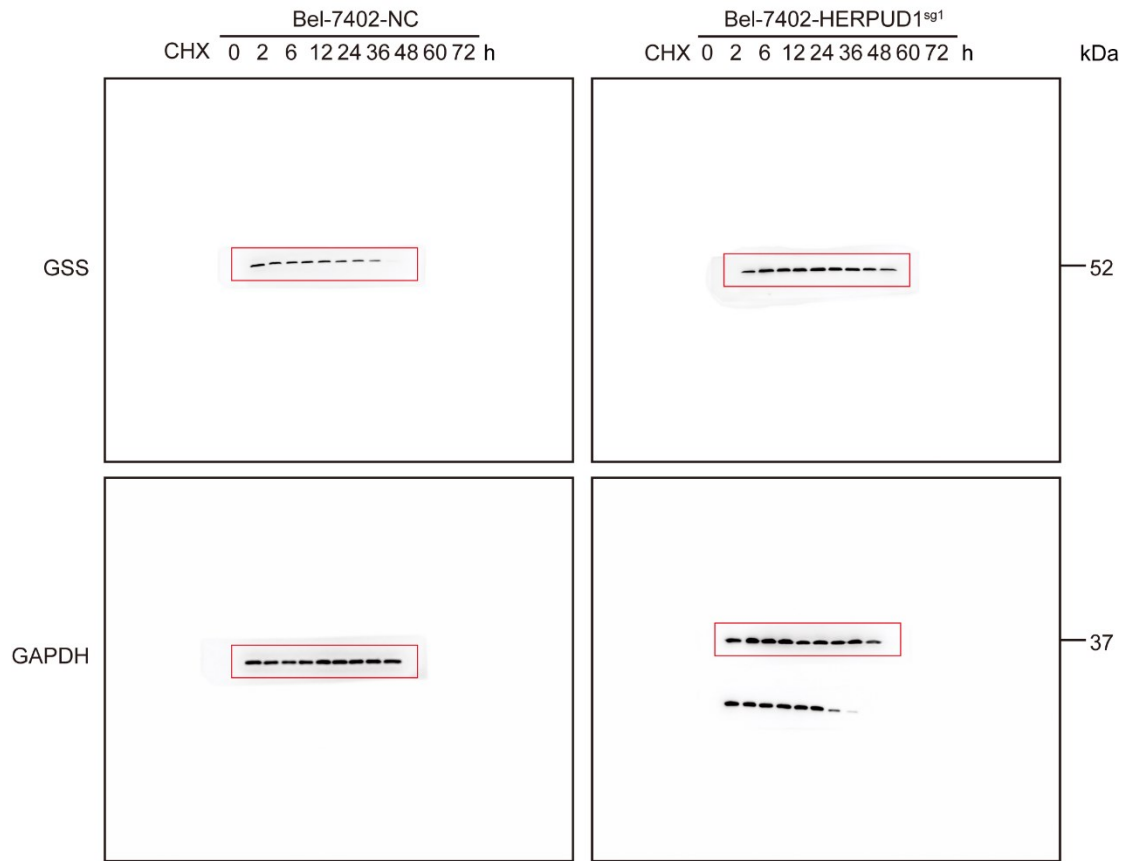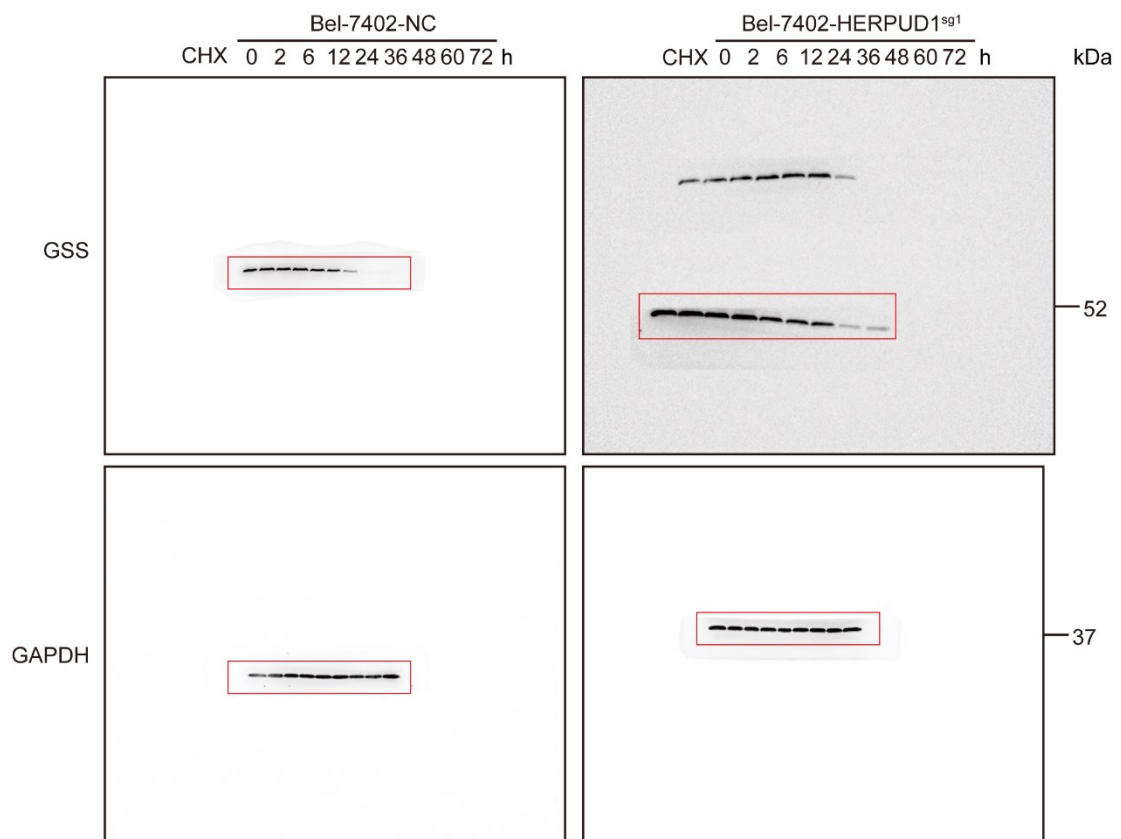

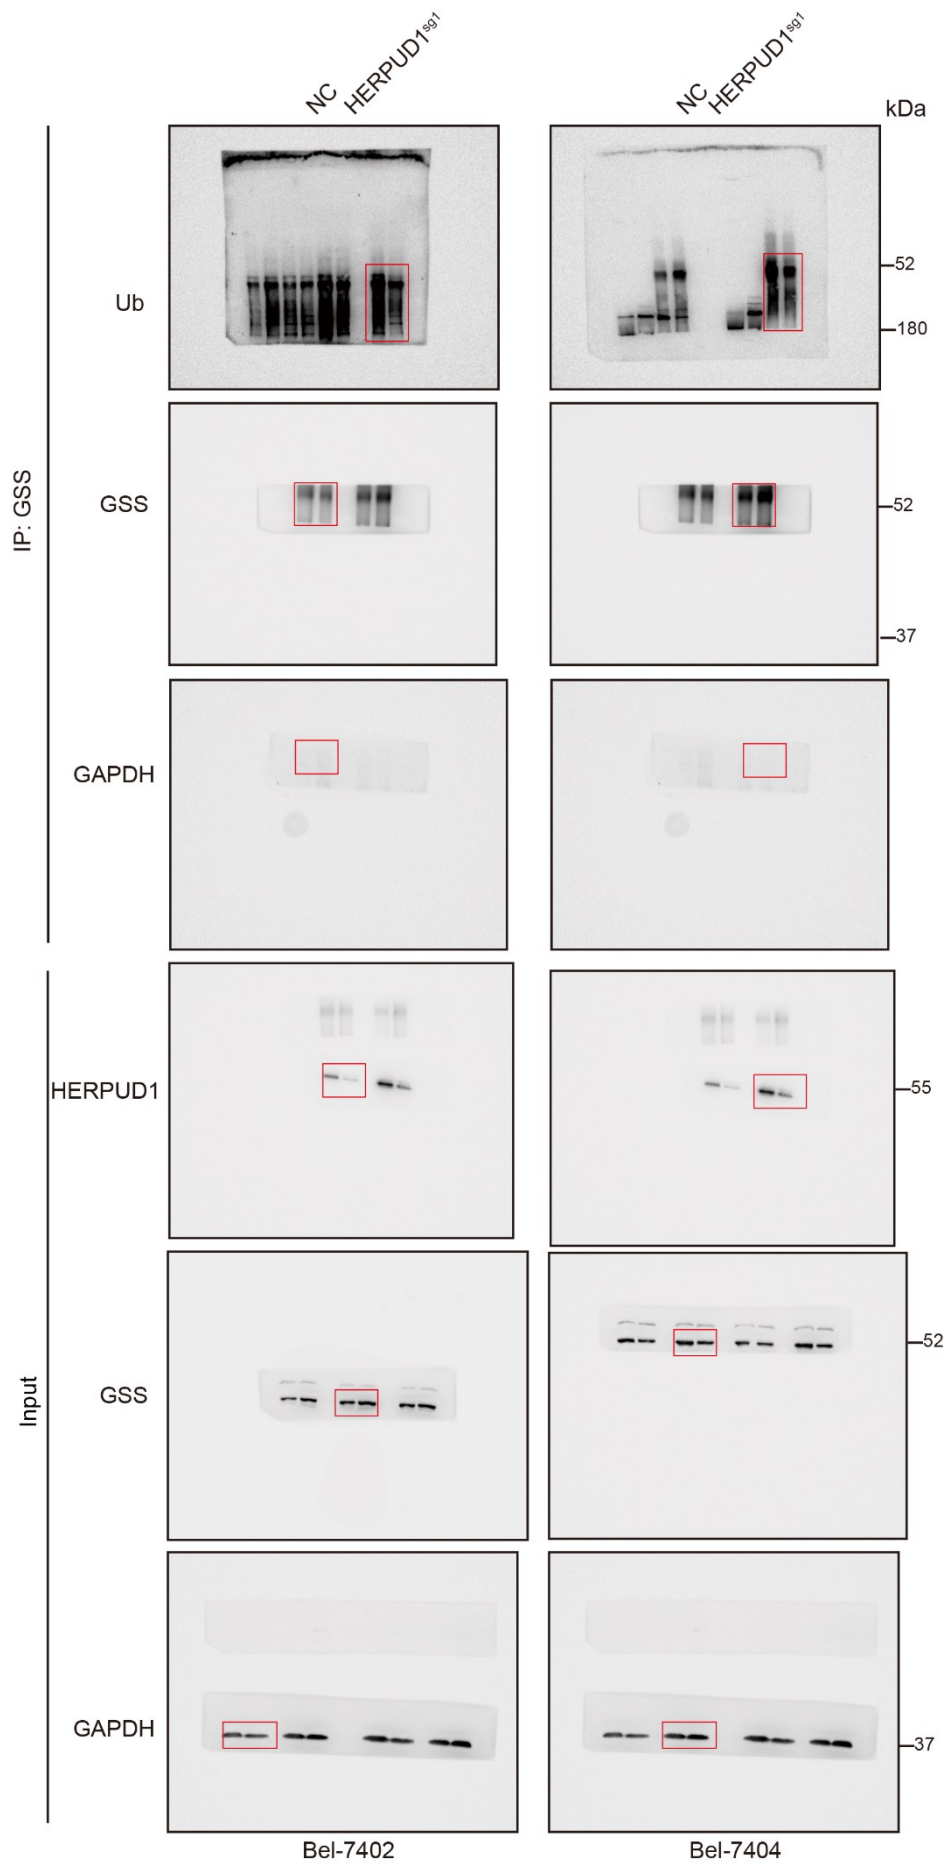

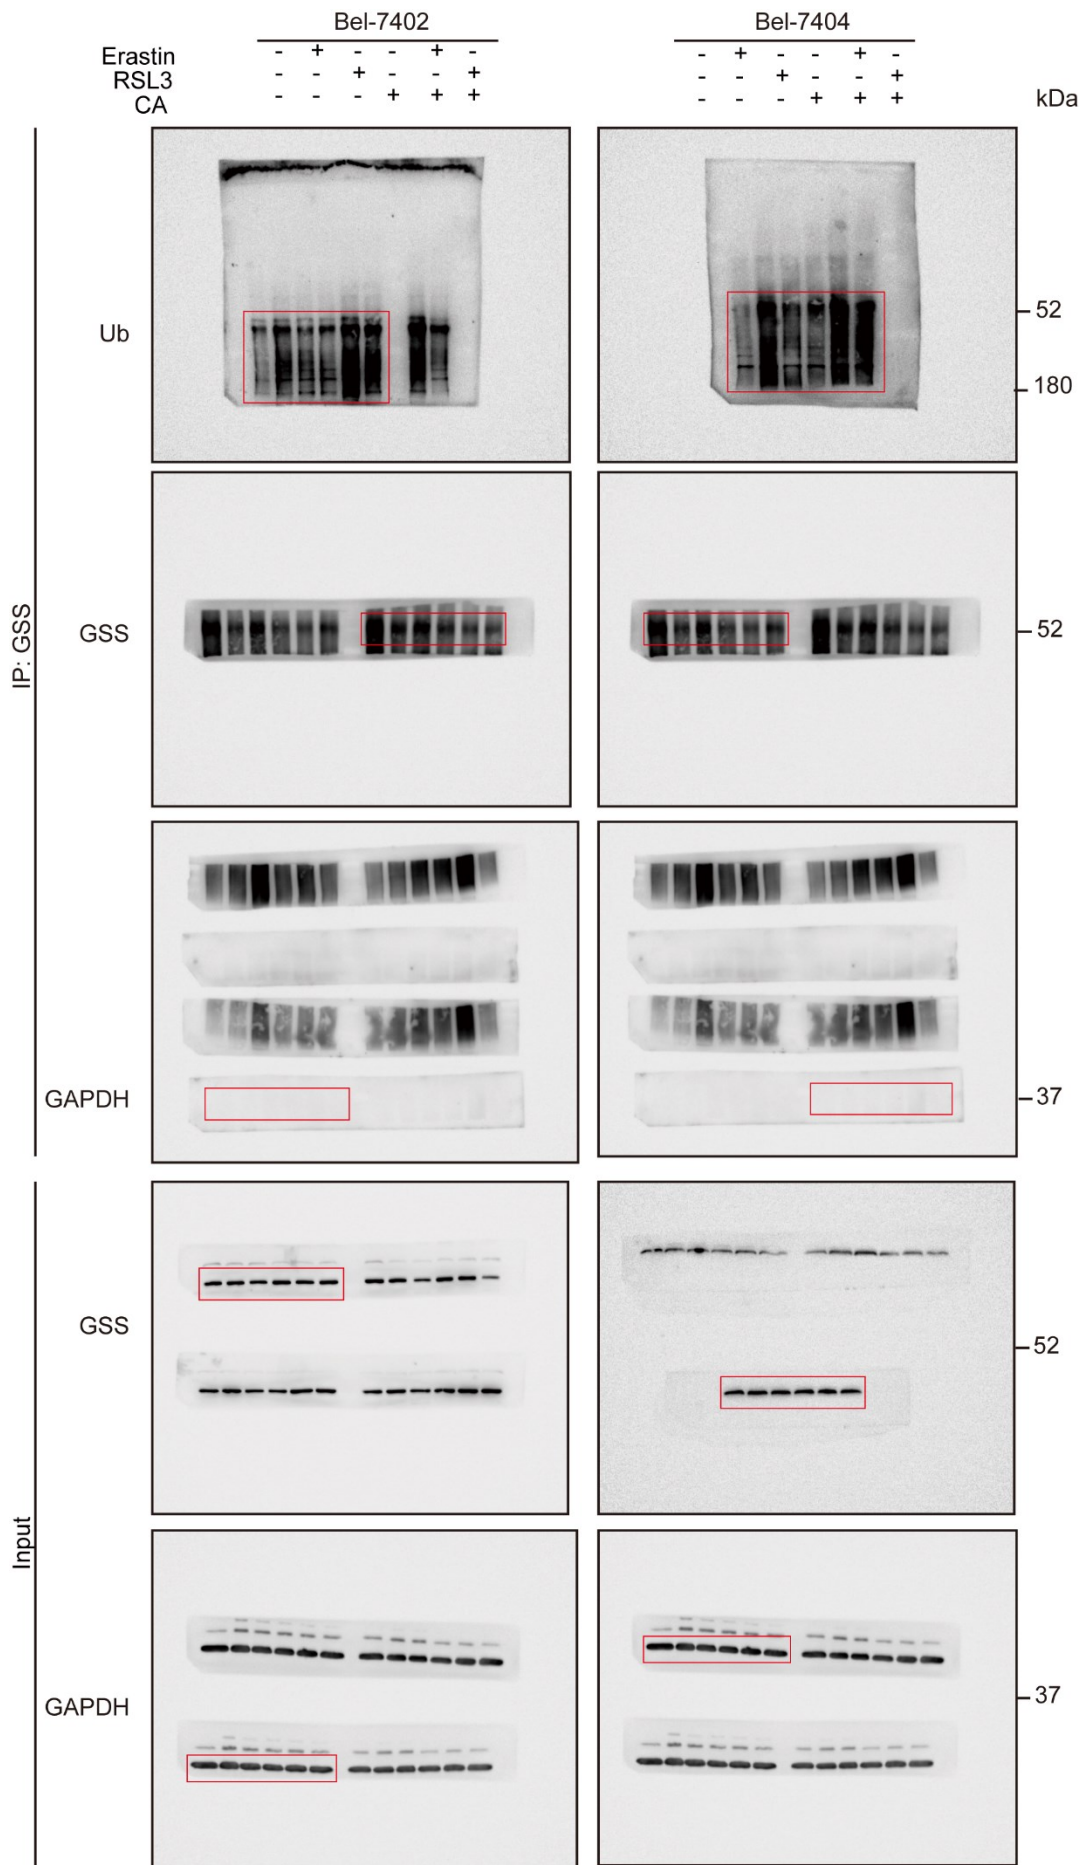

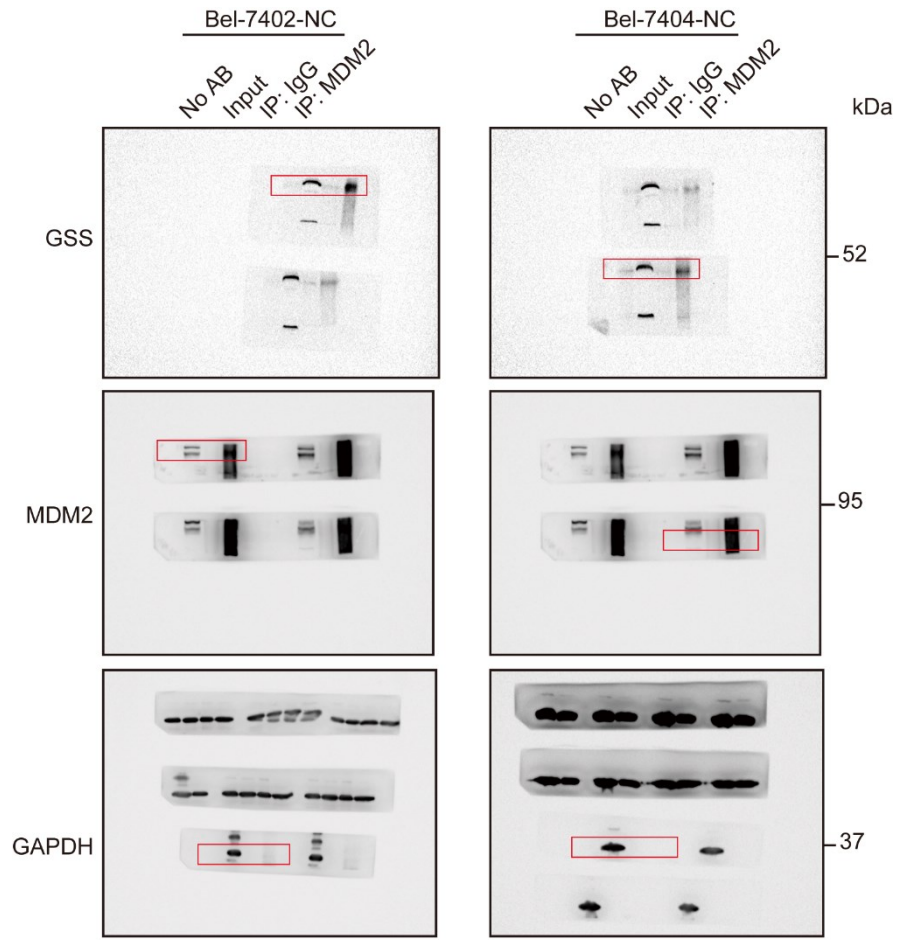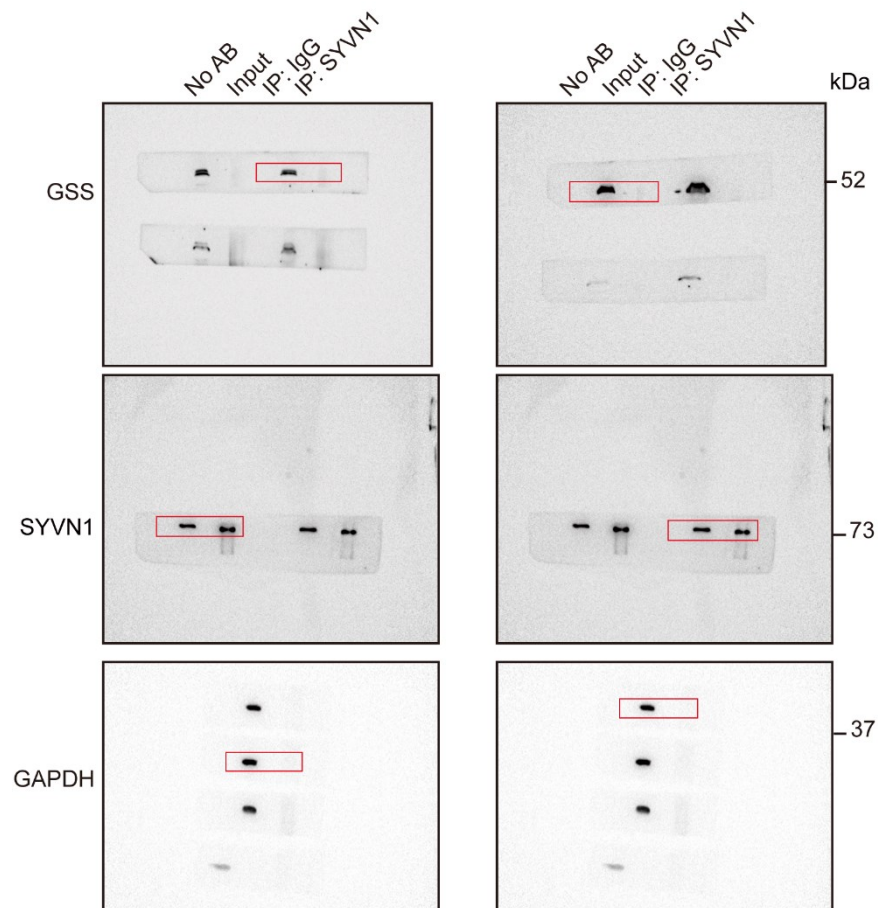

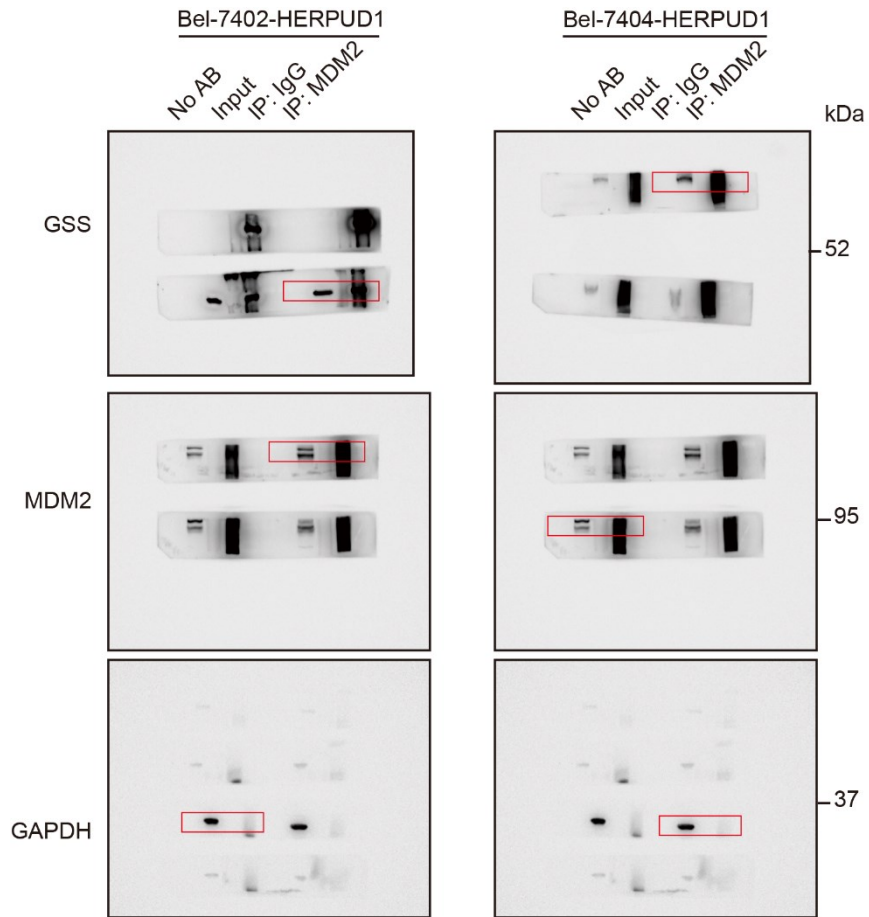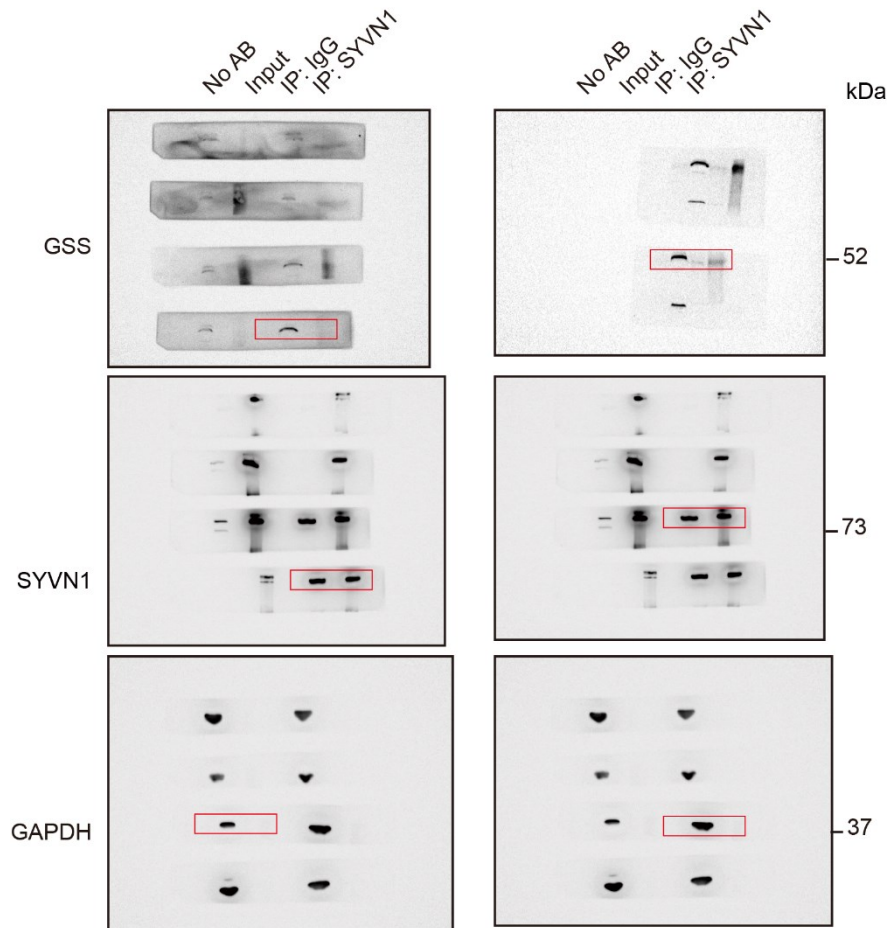



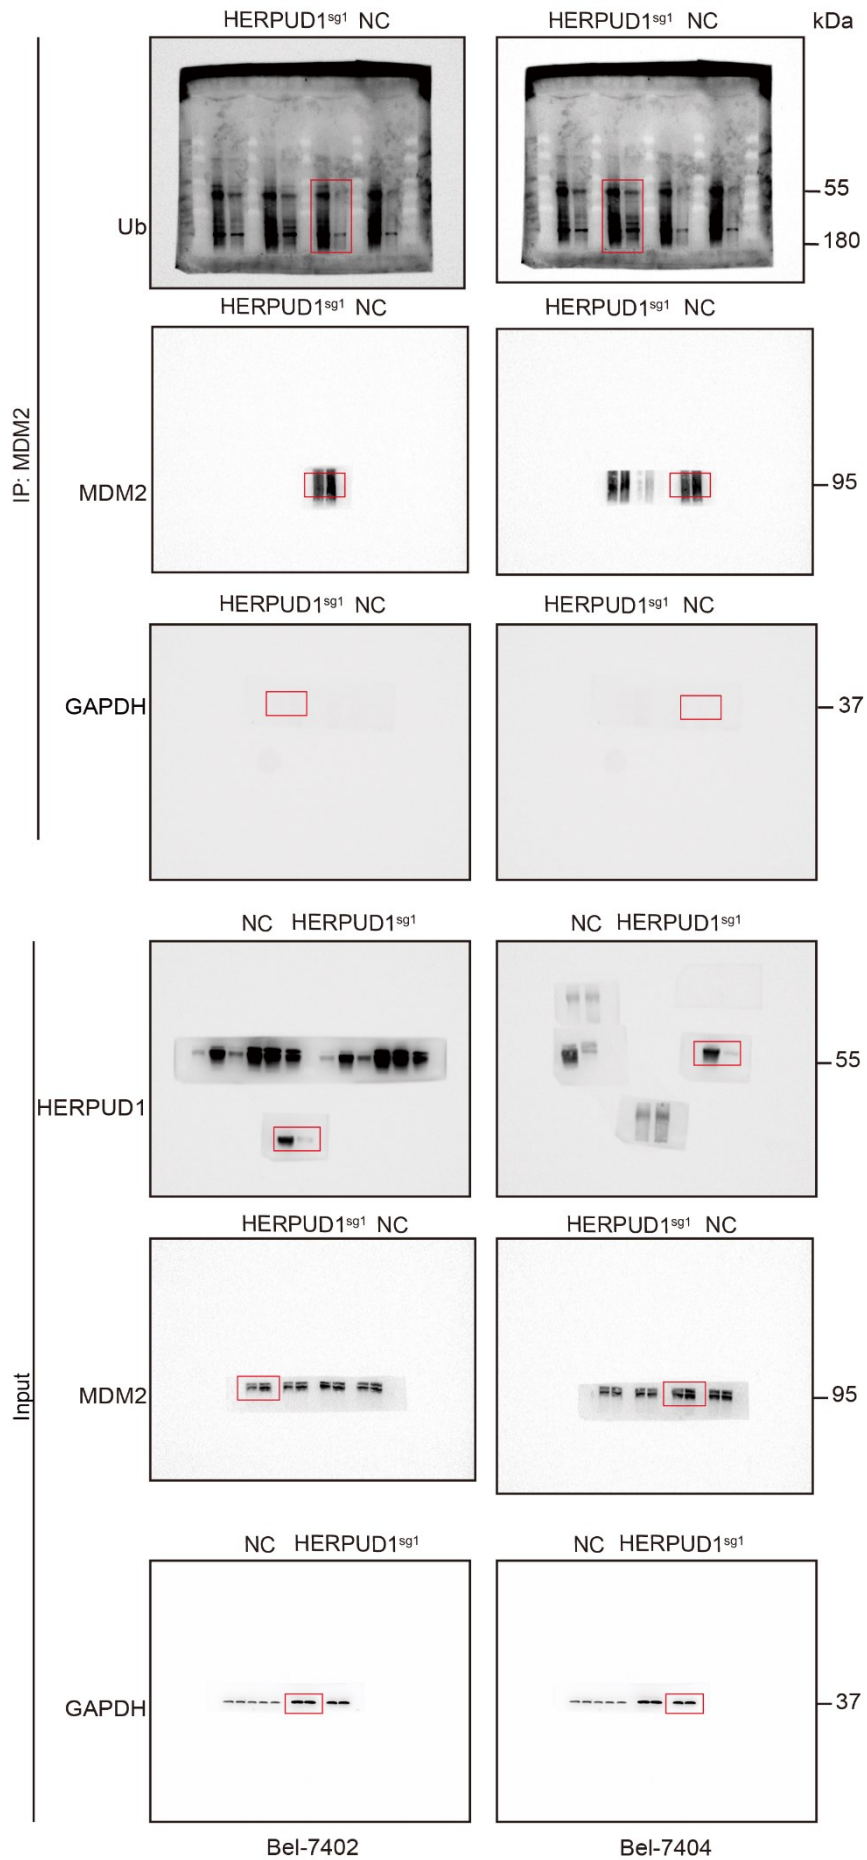

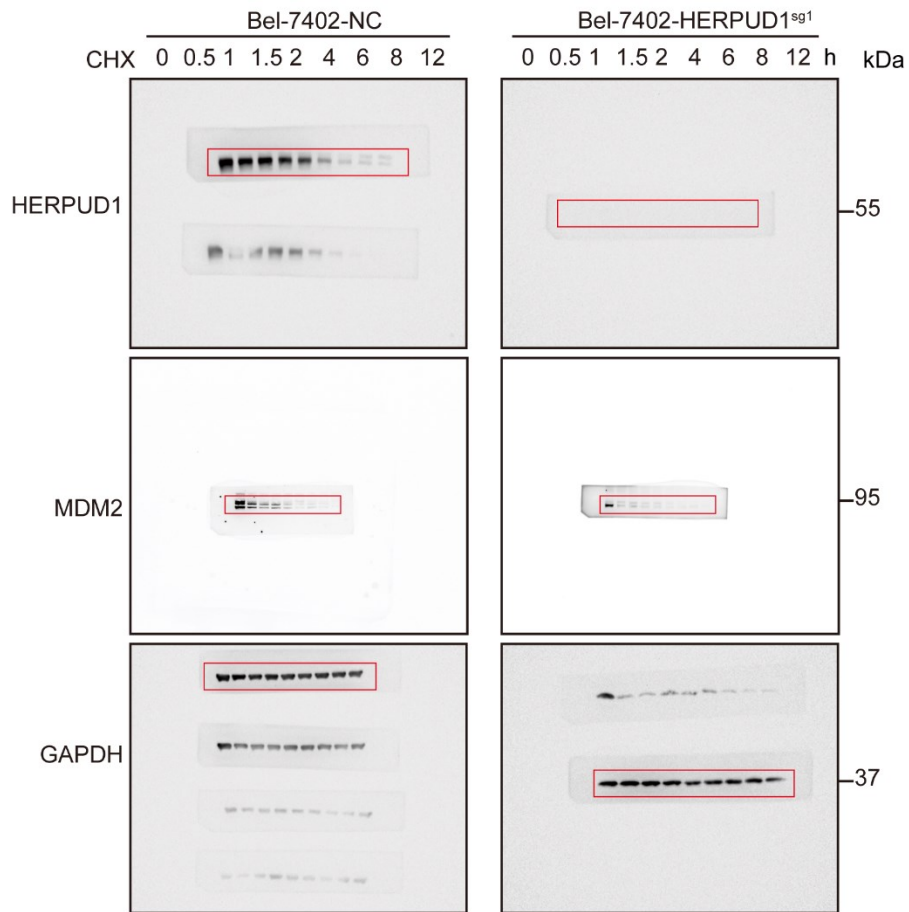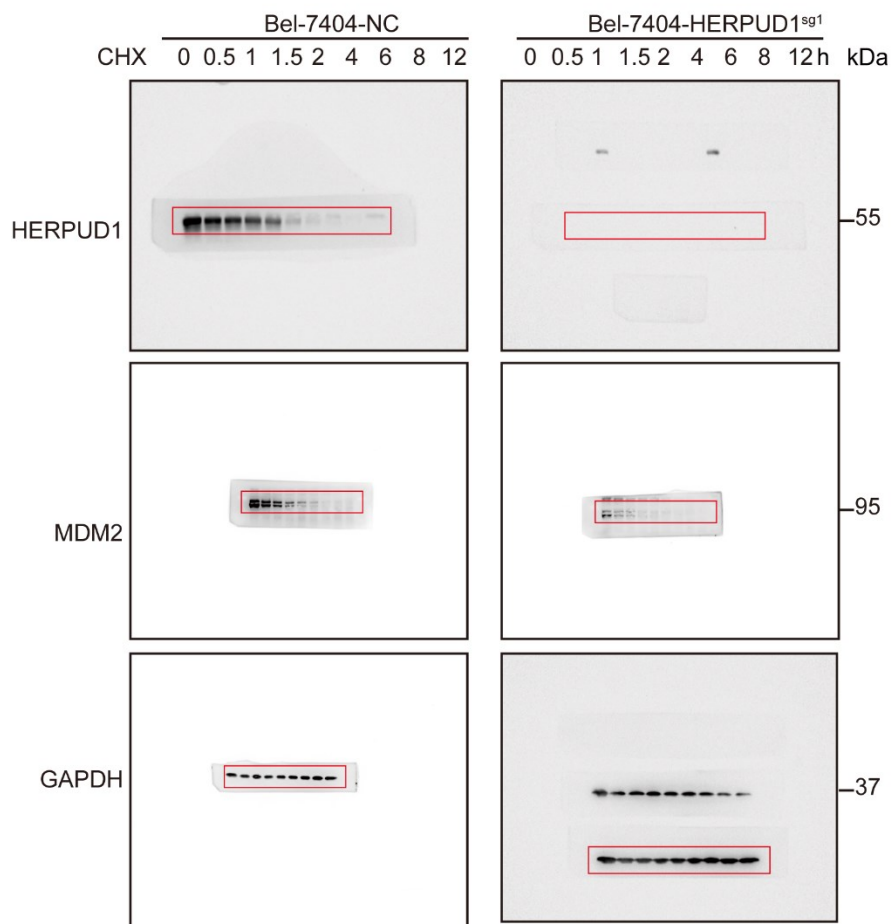

Bel-7402

|     |   |   |   |   |
|-----|---|---|---|---|
| IKE | - | + | - | + |
| CA  | - | - | + | + |

kDa

HERPUD1

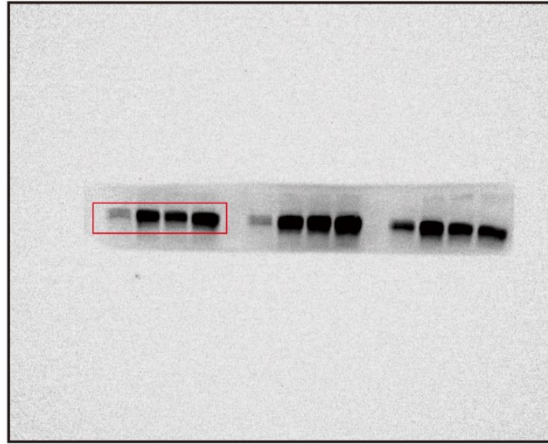

55

GSS

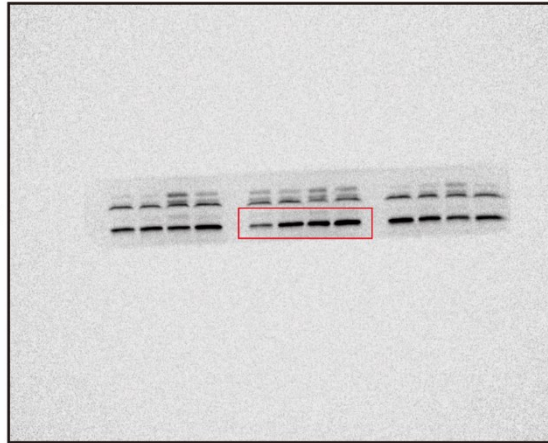

52

GAPDH

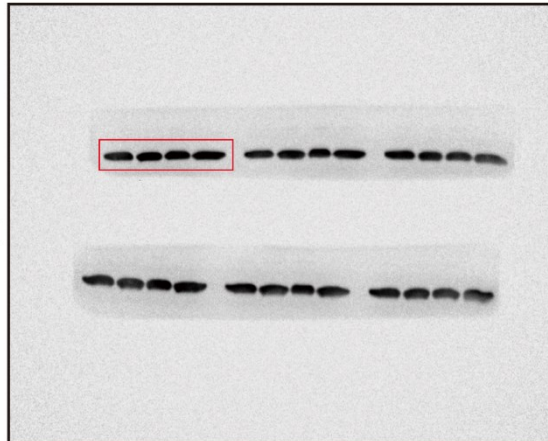

37

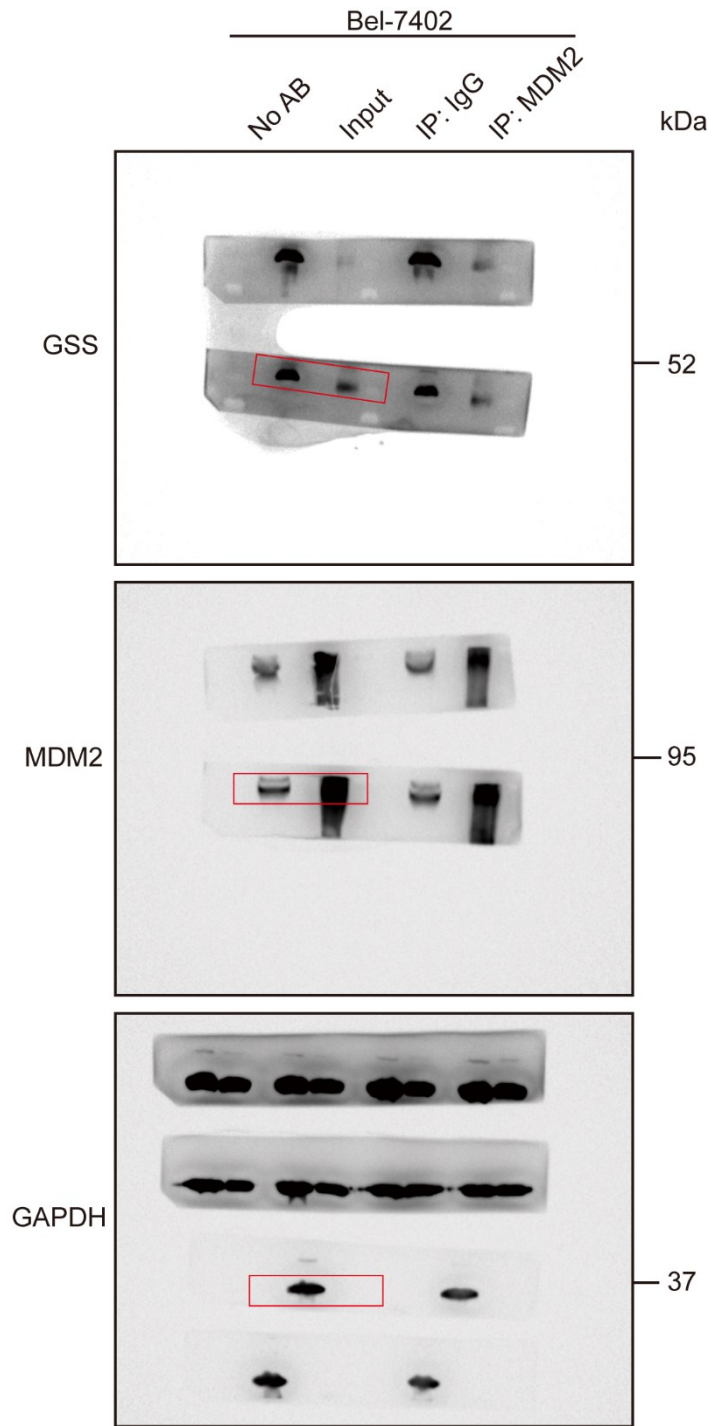

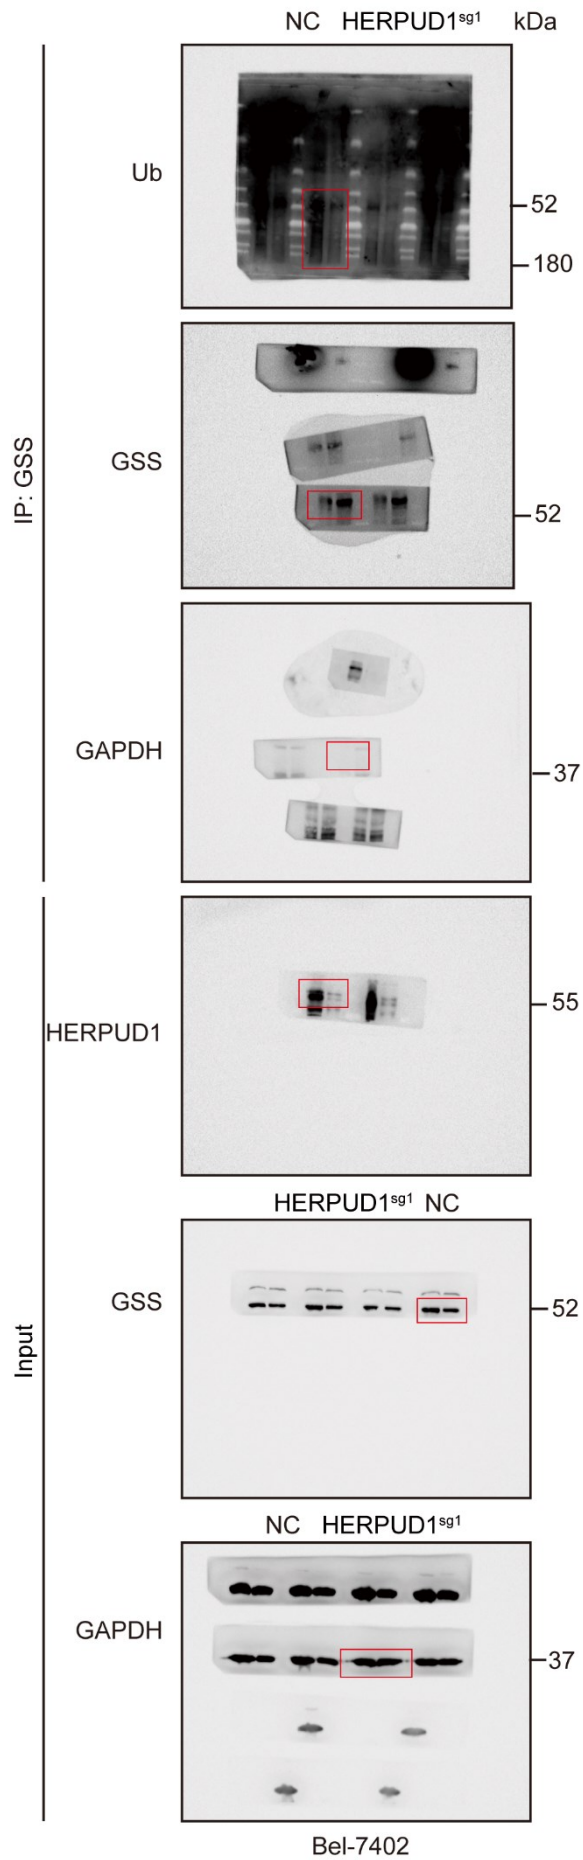

Bel-7402

|     |   |   |   |   |
|-----|---|---|---|---|
| IKE | - | + | - | + |
| CA  | - | - | + | + |

kDa

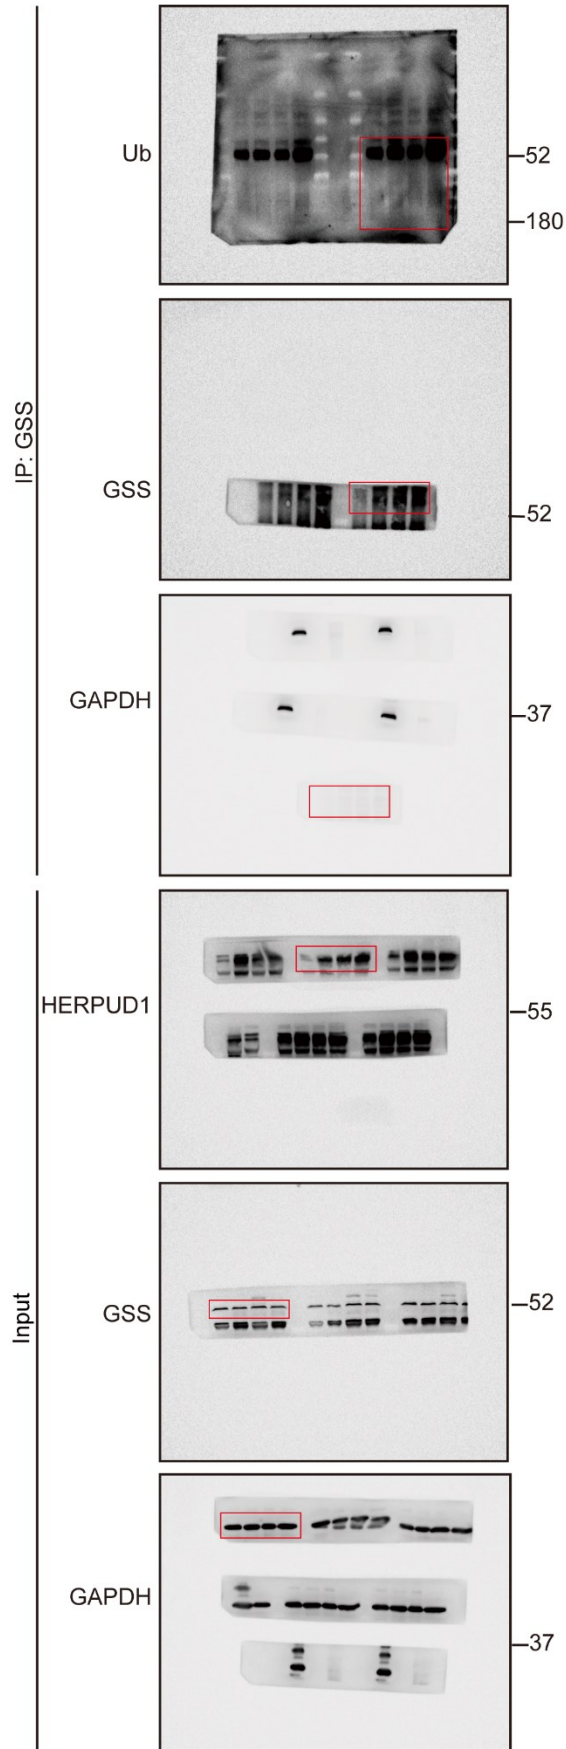

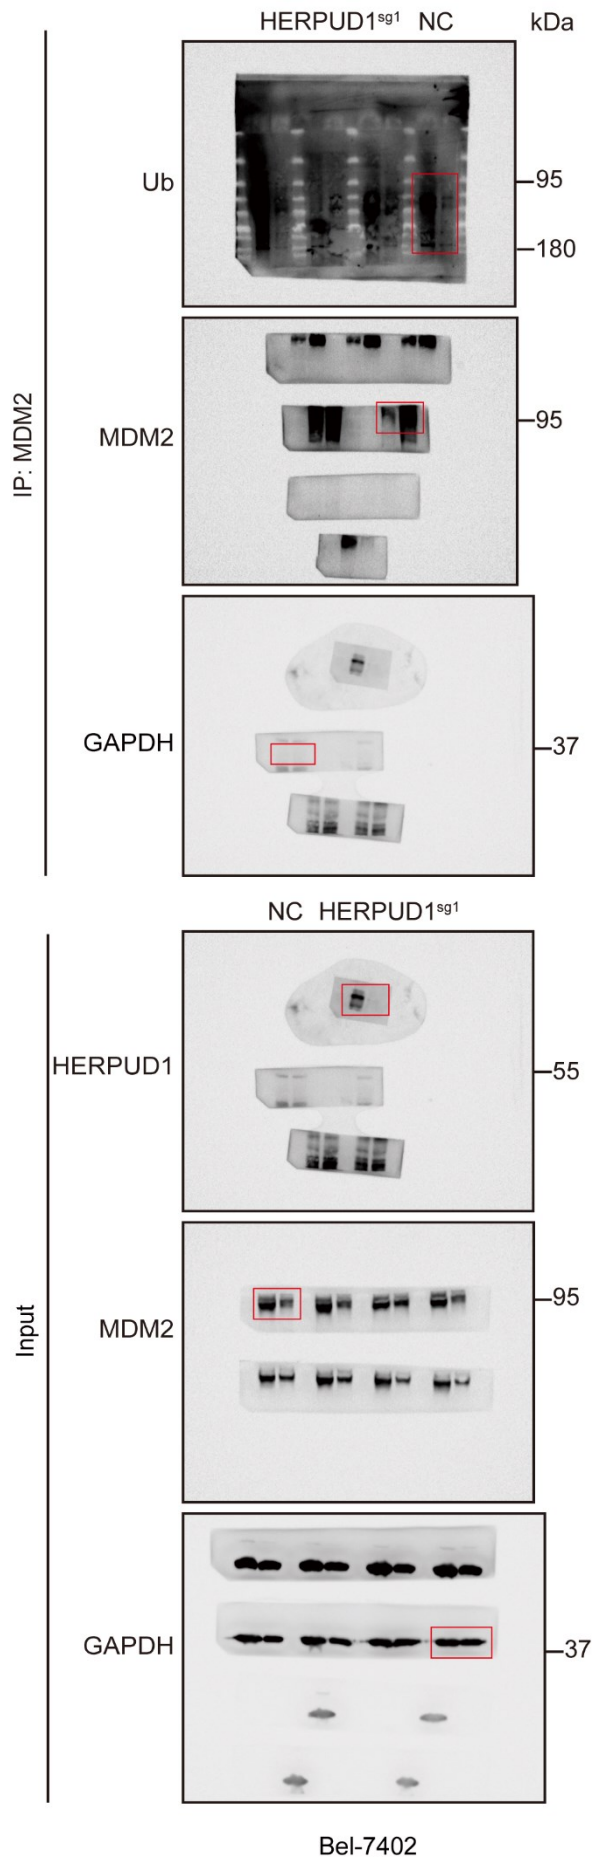

Supplement: 41420_2022_1169_MOESM2_ESM.pdf [file 41420_2022_1169_MOESM2_ESM.pdf]
